# Supplementary material
Source: Springer Nature journal article supplement (https://www.springermedizin.de/resource/supplementary/12968_2011_2569_MOESM6_ESM.pdf/9582254)

## Temperature distribution at 10g contact pressure and at different irrigation rates

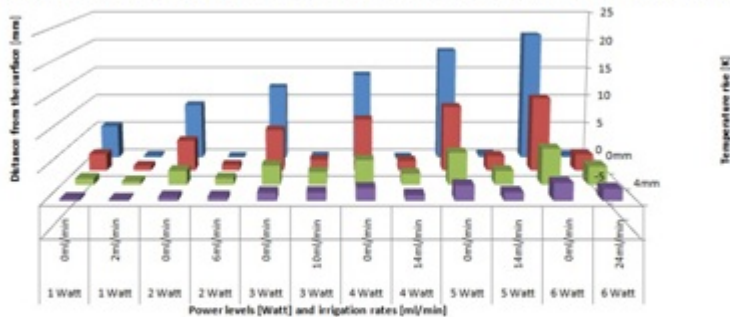

## Temperature distribution at 90g contact pressure and different irrigation rates

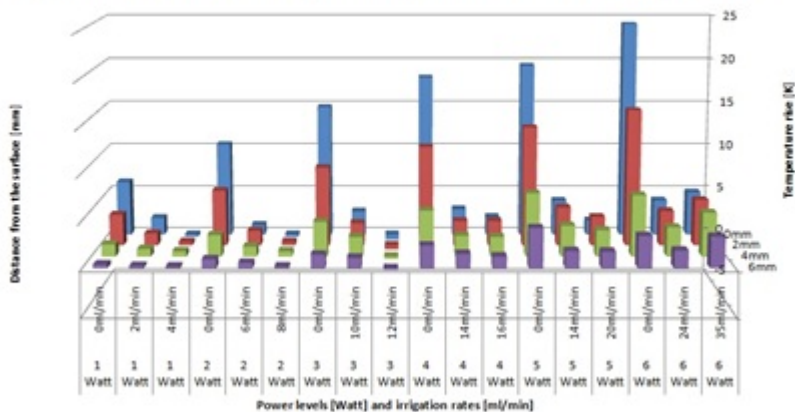

Supplement: MOESM6 [file 9582254]
